# Supplementary material for: Natural variability of minimotifs in 1092 people indicates that minimotifs are targets of evolution
Source: PubMed Central journal article supplement (PMC4513861; doi:10.1093/nar/gkv580), 2015-06-11
Supplement: supp_gkv580_nar-01136-n-2015-File003.pdf [file supp_gkv580_nar-01136-n-2015-File003.pdf]

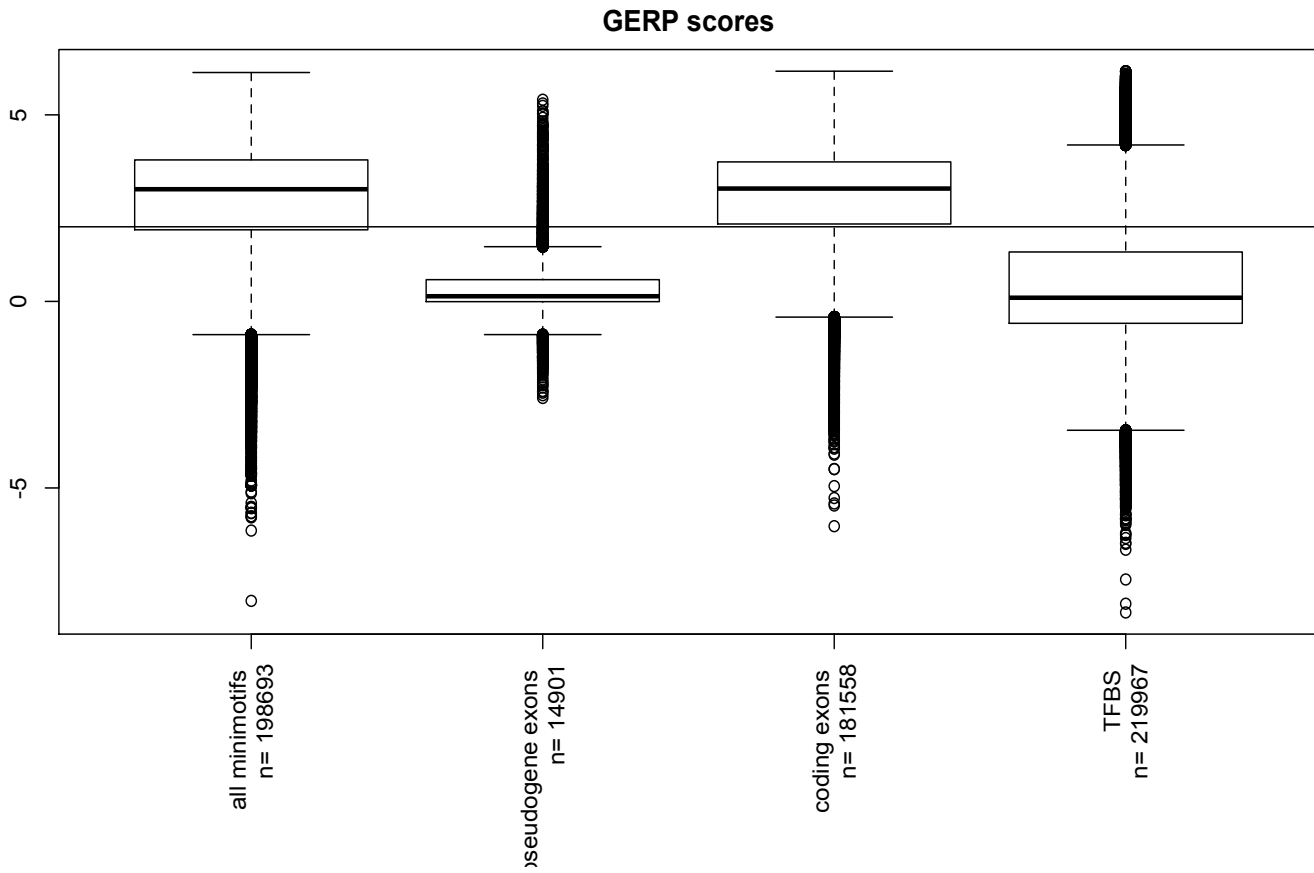

**Figure S1.** Quartile plots of GERP scores for different genomic regions.

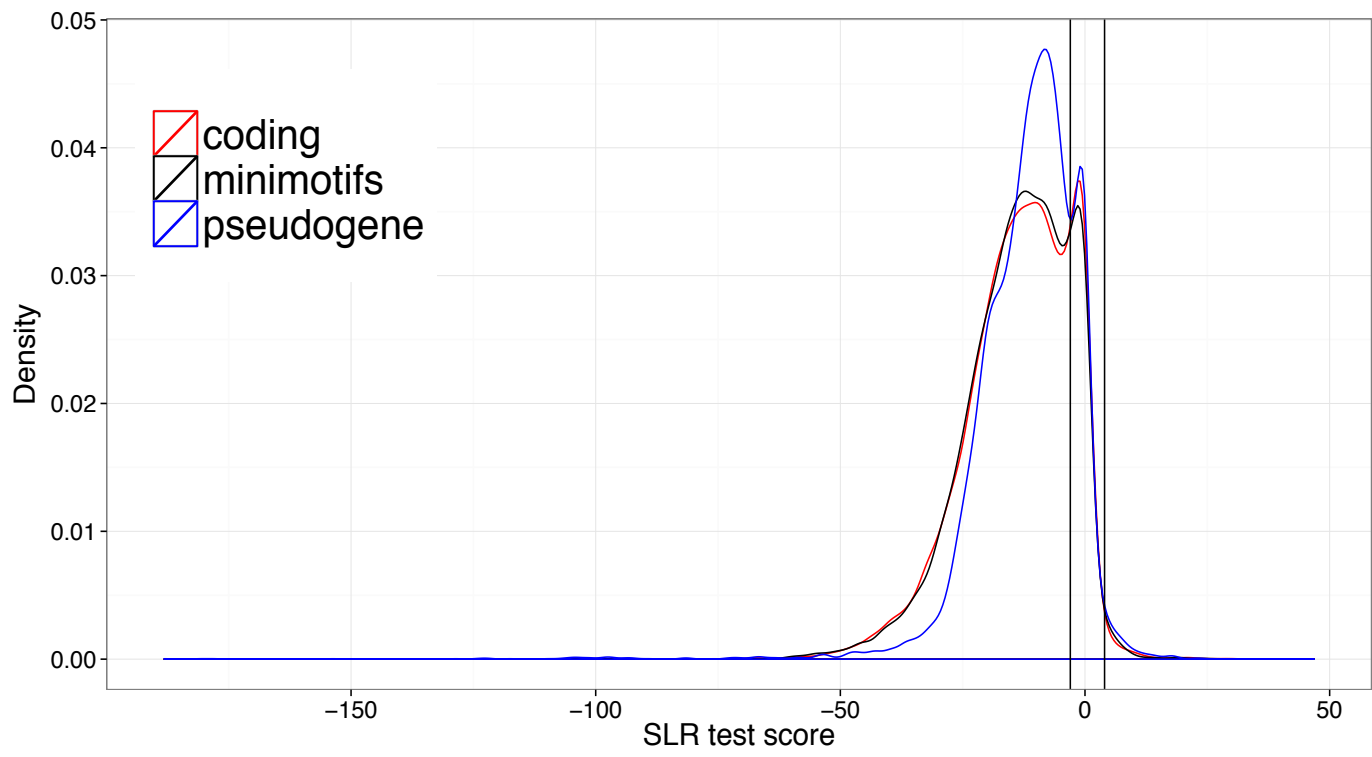

**Figure S2.** Density plot of SLR scores for different genomic regions. Vertical lines indicated threshold for negative, neutral, and positive selection.

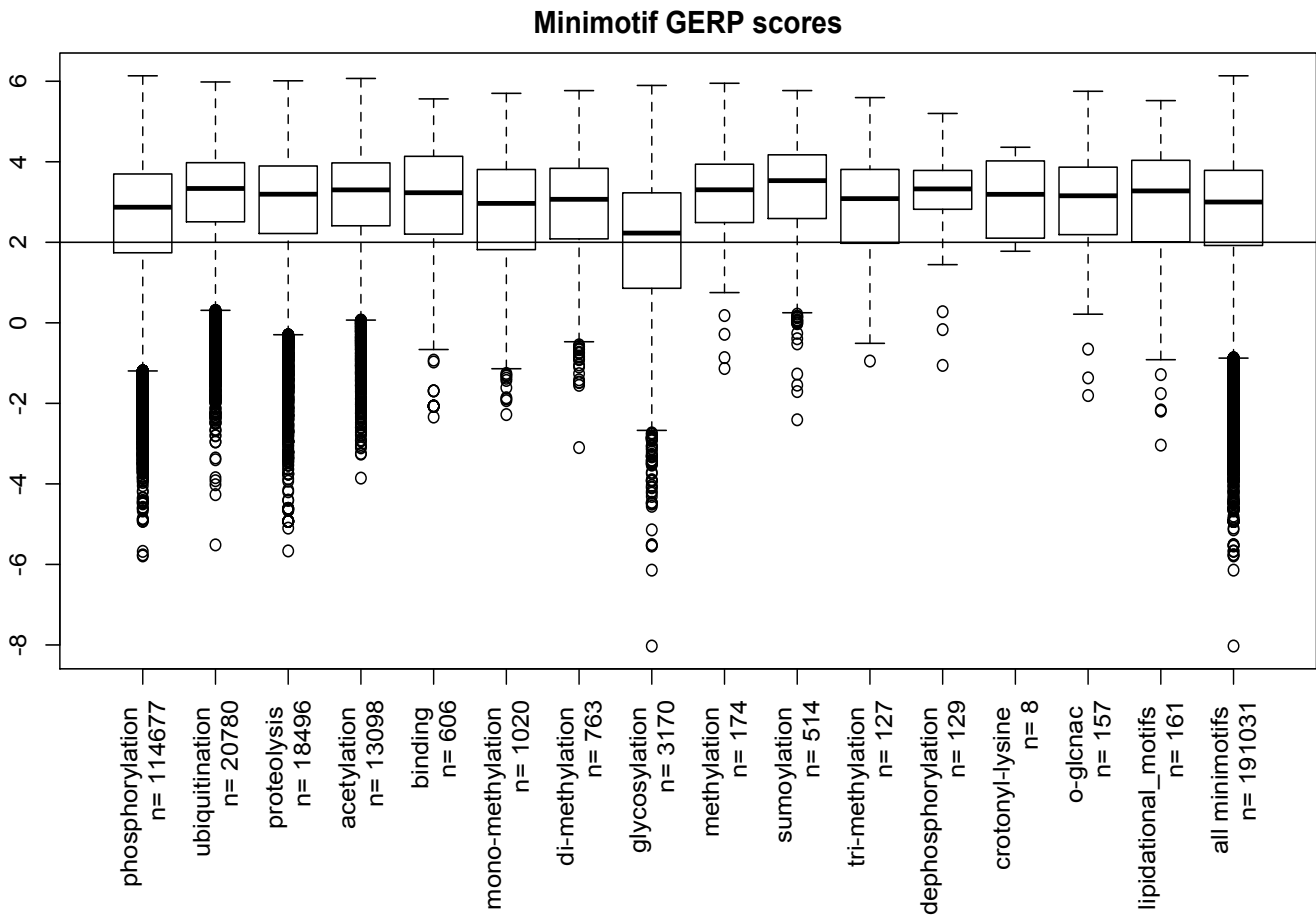

**Figure S3.** Quartile plots of GERP scores for different types of minimotif subactivities.

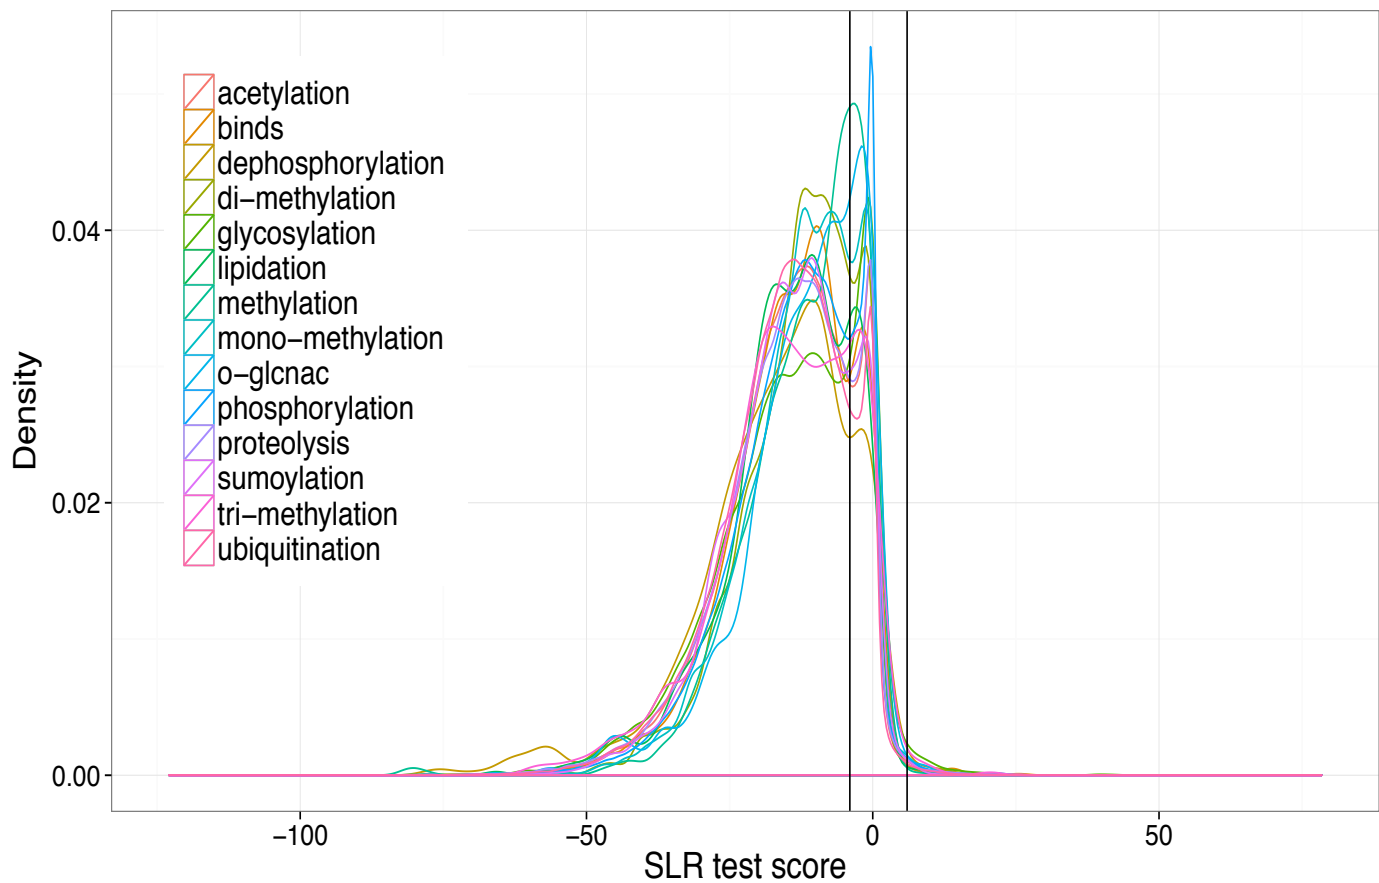

**Figure S4.** Density plot of SLR scores for different minimotif subactivities. Vertical lines indicated threshold for negative, neutral, and positive selection determined from **Fig. S2**.
